# Supplementary material for: Air–water CO 2 evasion from US East Coast estuaries
Source: Copernicus journal article supplement (doi:10.5194/bg-14-2441-2017), 2017-05-15
Supplement: Supplementary file 1 [file Table S1.pdf › Table S1.pdf]

**Table S1:** Seasonal surface area (*S*), fresh water discharge (*Q*), residence time (*Rt*), *FCO<sub>2</sub>* and *NEM* of all simulated estuaries. W, Sp, Su, F correspond to winter, spring, summer and fall, respectively.

| System name      | long degrees | lat degree | Season | $Q$<br>$m^3 s^{-1}$ | $T$<br>$^{\circ}C$ | $\overline{FCO_2}$<br>$mol\ C\ m^{-2}\ yr^{-1}$ | $\overline{NEM}$<br>$mol\ C\ m^{-2}\ yr^{-1}$ | $FCO_2$<br>$10^6\ mol\ C\ yr^{-1}$ | $NEM$<br>$10^6\ mol\ C\ yr^{-1}$ |
|------------------|--------------|------------|--------|---------------------|--------------------|-------------------------------------------------|-----------------------------------------------|------------------------------------|----------------------------------|
| <b>NAR</b>       |              |            |        |                     |                    |                                                 |                                               |                                    |                                  |
| -                | -67.25       | 44.75      | W      | 29.4                | 3.52               | 5.2                                             | -19.7                                         | 9                                  | -34                              |
|                  | -67.25       | 44.75      | Sp     | 97.4                | 5.6                | 2.6                                             | -31.5                                         | 5                                  | -55                              |
|                  | -67.25       | 44.75      | Su     | 26.2                | 11                 | 2.7                                             | -56.0                                         | 5                                  | -98                              |
|                  | -67.25       | 44.75      | F      | 46.6                | 9                  | 4.3                                             | -42.3                                         | 8                                  | -74                              |
| -                | -67.25       | 45.25      | W      | 56.2                | 3.52               | 6.8                                             | -31.9                                         | 19                                 | -88                              |
|                  | -67.25       | 45.25      | Sp     | 186.2               | 5.6                | 4.1                                             | -51.9                                         | 11                                 | -144                             |
|                  | -67.25       | 45.25      | Su     | 50.1                | 11                 | 5.9                                             | -77.7                                         | 16                                 | -215                             |
|                  | -67.25       | 45.25      | F      | 89.1                | 9                  | 7.3                                             | -65.2                                         | 20                                 | -181                             |
| -                | -67.25       | 45.25      | W      | 56.2                | 3.52               | 14.4                                            | -31.9                                         | 40                                 | -88                              |
|                  | -67.25       | 45.25      | Sp     | 186.2               | 5.6                | 11.2                                            | -51.8                                         | 31                                 | -144                             |
|                  | -67.25       | 45.25      | Su     | 50.1                | 11                 | 11.3                                            | -77.7                                         | 31                                 | -215                             |
|                  | -67.25       | 45.25      | F      | 89.1                | 9                  | 18.1                                            | -65.1                                         | 50                                 | -181                             |
| -                | -67.75       | 44.75      | W      | 55.8                | 3.52               | 7.9                                             | -33.7                                         | 7                                  | -29                              |
|                  | -67.75       | 44.75      | Sp     | 184.9               | 5.6                | 10.0                                            | -41.8                                         | 9                                  | -36                              |
|                  | -67.75       | 44.75      | Su     | 49.8                | 11                 | 2.7                                             | -103.4                                        | 2                                  | -89                              |
|                  | -67.75       | 44.75      | F      | 88.5                | 9                  | 6.0                                             | -75.1                                         | 5                                  | -65                              |
| <b>Penobscot</b> |              |            |        |                     |                    |                                                 |                                               |                                    |                                  |
|                  | -68.25       | 44.75      | W      | 53                  | 3.52               | 5.3                                             | -30.0                                         | 18                                 | -100                             |
|                  | -68.25       | 44.75      | Sp     | 175.8               | 5.6                | 2.6                                             | -43.1                                         | 9                                  | -144                             |
|                  | -68.25       | 44.75      | Su     | 47.3                | 11                 | 3.9                                             | -87.9                                         | 13                                 | -294                             |
|                  | -68.25       | 44.75      | F      | 84.1                | 9                  | 4.7                                             | -63.9                                         | 16                                 | -214                             |
| <b>Kennebec</b>  |              |            |        |                     |                    |                                                 |                                               |                                    |                                  |
|                  | -68.75       | 44.75      | W      | 236.2               | 3.52               | 20.3                                            | -31.5                                         | 418                                | -648                             |
|                  | -68.75       | 44.75      | Sp     | 783.5               | 5.6                | 16.4                                            | -51.4                                         | 337                                | -1057                            |
|                  | -68.75       | 44.75      | Su     | 210.9               | 11                 | 39.5                                            | -83.3                                         | 813                                | -1712                            |
|                  | -68.75       | 44.75      | F      | 374.8               | 9                  | 33.3                                            | -66.5                                         | 685                                | -1367                            |
| -                | -69.75       | 44.25      | W      | 473.5               | 3.52               | 28.2                                            | -44.0                                         | 323                                | -505                             |
|                  | -69.75       | 44.25      | Sp     | 1570.               | 5.6                | 17.6                                            | -61.1                                         | 202                                | -701                             |
|                  | -69.75       | 44.25      | Su     | 422.8               | 11                 | 40.0                                            | -107.3                                        | 459                                | -1230                            |
|                  | -69.75       | 44.25      | F      | 751.1               | 9                  | 43.3                                            | -85.3                                         | 497                                | -978                             |
| -                | -70.25       | 43.75      | W      | 19.7                | 0                  | 3.4                                             | -19.4                                         | 3                                  | -16                              |
|                  | -70.25       | 43.75      | Sp     | 65.3                | 0                  | 1.8                                             | -22.5                                         | 1                                  | -18                              |
|                  | -70.25       | 43.75      | Su     | 17.6                | 0                  | 1.0                                             | -21.2                                         | 1                                  | -17                              |
|                  | -70.25       | 43.75      | F      | 31.3                | 0                  | 2.5                                             | -21.1                                         | 2                                  | -17                              |
| -                | -70.75       | 41.75      | W      | 34.1                | 5                  | 4.7                                             | -2.8                                          | 315                                | -184                             |
|                  | -70.75       | 41.75      | Sp     | 70.5                | 8                  | 4.4                                             | -3.8                                          | 295                                | -253                             |
|                  | -70.75       | 41.75      | Su     | 16.2                | 16                 | 5.0                                             | -5.2                                          | 336                                | -350                             |
|                  | -70.75       | 41.75      | F      | 35.2                | 10                 | 5.7                                             | -4.1                                          | 379                                | -276                             |
| -                | -70.75       | 42.25      | W      | 162.8               | 5                  | 12.5                                            | -20.1                                         | 190                                | -305                             |
|                  | -70.75       | 42.25      | Sp     | 226.8               | 9                  | 9.9                                             | -29.0                                         | 150                                | -439                             |
|                  | -70.75       | 42.25      | Su     | 51.3                | 18                 | 25.5                                            | -48.6                                         | 387                                | -737                             |
|                  | -70.75       | 42.25      | F      | 116.5               | 10                 | 16.9                                            | -34.0                                         | 256                                | -515                             |
| <b>Merrimack</b> |              |            |        |                     |                    |                                                 |                                               |                                    |                                  |
|                  | -70.75       | 42.75      | W      | 325.3               | 5                  | 45.3                                            | -35.2                                         | 175                                | -136                             |
|                  | -70.75       | 42.75      | Sp     | 453.2               | 9                  | 39.5                                            | -53.5                                         | 153                                | -207                             |
|                  | -70.75       | 42.75      | Su     | 102.4               | 18                 | 87.4                                            | -127.1                                        | 338                                | -492                             |
|                  | -70.75       | 42.75      | F      | 232.8               | 10                 | 53.2                                            | -60.1                                         | 206                                | -233                             |
| <b>MAR</b>       |              |            |        |                     |                    |                                                 |                                               |                                    |                                  |
| -                | -70.75       | 43.25      | W      | 165.9               | 4                  | 16.5                                            | -20.8                                         | 119                                | -151                             |
|                  | -70.75       | 43.25      | Sp     | 231.2               | 7                  | 15.6                                            | -29.3                                         | 112                                | -212                             |
|                  | -70.75       | 43.25      | Su     | 52.3                | 14                 | 32.5                                            | -61.6                                         | 235                                | -445                             |
|                  | -70.75       | 43.25      | F      | 118.7               | 9                  | 21.9                                            | -37.8                                         | 158                                | -273                             |
| -                | -71.25       | 41.75      | W      | 32                  | 5                  | 3.2                                             | -1.6                                          | 193                                | -93                              |
|                  | -71.25       | 41.75      | Sp     | 66.3                | 8                  | 3.9                                             | -2.5                                          | 237                                | -151                             |
|                  | -71.25       | 41.75      | Su     | 15.3                | 16                 | 4.0                                             | -3.4                                          | 241                                | -202                             |
|                  | -71.25       | 41.75      | F      | 33.1                | 10                 | 4.4                                             | -2.7                                          | 263                                | -162                             |
| -                | -71.75       | 41.25      | W      | 127                 | 5                  | 53.8                                            | -17.2                                         | 261                                | -84                              |

|             |        |       |    |       |    |       |       |      |       |
|-------------|--------|-------|----|-------|----|-------|-------|------|-------|
|             | -71.75 | 41.25 | Sp | 262.9 | 8  | 17.8  | -26.1 | 86   | -126  |
|             | -71.75 | 41.25 | Su | 60.5  | 16 | 35.8  | -54.9 | 174  | -266  |
|             | -71.75 | 41.25 | F  | 131.2 | 10 | 33.5  | -32.2 | 162  | -156  |
| -           | -72.75 | 40.75 | W  | 28.9  | 5  | 31.5  | -15.9 | 150  | -76   |
|             | -72.75 | 40.75 | Sp | 59.9  | 10 | 11.5  | -28.6 | 55   | -136  |
|             | -72.75 | 40.75 | Su | 13.8  | 21 | 9.9   | -19.6 | 47   | -93   |
|             | -72.75 | 40.75 | F  | 29.9  | 13 | 69.8  | -20.4 | 333  | -97   |
| -           | -72.75 | 41.25 | W  | 157.7 | 5  | 167.3 | -20.0 | 407  | -49   |
|             | -72.75 | 41.25 | Sp | 326.5 | 8  | 12.0  | -32.3 | 29   | -79   |
|             | -72.75 | 41.25 | Su | 75.2  | 16 | 28.8  | -58.9 | 70   | -143  |
|             | -72.75 | 41.25 | F  | 163   | 10 | 395.1 | -36.4 | 962  | -89   |
| Connecticut | -72.75 | 41.75 | W  | 509.4 | 5  | 52.3  | -25.2 | 679  | -327  |
|             | -72.75 | 41.75 | Sp | 1054. | 8  | 48.8  | -43.7 | 633  | -566  |
|             | -72.75 | 41.75 | Su | 242.9 | 16 | 68.1  | -68.6 | 884  | -890  |
|             | -72.75 | 41.75 | F  | 526.5 | 10 | 54.3  | -45.2 | 704  | -586  |
| -           | -73.25 | 40.75 | W  | 509.4 | 5  | 52.3  | -25.2 | 679  | -327  |
|             | -73.25 | 40.75 | Sp | 1054. | 8  | 48.8  | -43.7 | 633  | -566  |
|             | -73.25 | 40.75 | Su | 242.9 | 16 | 68.1  | -68.6 | 884  | -890  |
|             | -73.25 | 40.75 | F  | 526.5 | 10 | 54.3  | -45.2 | 704  | -586  |
| Hudson      | -74.25 | 40.75 | W  | 835.2 | 5  | 14.2  | -10.1 | 3927 | -2800 |
|             | -74.25 | 40.75 | Sp | 1128. | 10 | 17.7  | -12.7 | 4905 | -3511 |
|             | -74.25 | 40.75 | Su | 329.3 | 21 | 14.1  | -12.4 | 3907 | -3426 |
|             | -74.25 | 40.75 | F  | 680.8 | 13 | 15.8  | -12.0 | 4384 | -3313 |
| -           | -75.25 | 37.75 | W  | 141.3 | 9  | 18.0  | -5.4  | 1715 | -516  |
|             | -75.25 | 37.75 | Sp | 157.7 | 14 | 17.0  | -5.9  | 1615 | -557  |
|             | -75.25 | 37.75 | Su | 40    | 24 | 7.1   | -4.3  | 672  | -405  |
|             | -75.25 | 37.75 | F  | 88.4  | 16 | 13.6  | -4.7  | 1294 | -442  |
| -           | -75.25 | 38.75 | W  | 55.9  | 5  | 8.9   | -2.7  | 729  | -224  |
|             | -75.25 | 38.75 | Sp | 62.4  | 13 | 8.4   | -2.9  | 685  | -240  |
|             | -75.25 | 38.75 | Su | 15.8  | 23 | 5.1   | -3.5  | 422  | -286  |
|             | -75.25 | 38.75 | F  | 35    | 14 | 7.6   | -3.0  | 628  | -247  |
| Delaware    | -75.25 | 39.75 | W  | 664.7 | 5  | 9.3   | -6.7  | 3730 | -2667 |
|             | -75.25 | 39.75 | Sp | 726.6 | 12 | 9.4   | -7.0  | 3783 | -2812 |
|             | -75.25 | 39.75 | Su | 307.6 | 22 | 10.5  | -9.4  | 4205 | -3778 |
|             | -75.25 | 39.75 | F  | 529.6 | 13 | 10.5  | -8.2  | 4225 | -3294 |
| -           | -75.75 | 39.25 | W  | 32.1  | 5  | 7.9   | -2.4  | 409  | -125  |
|             | -75.75 | 39.25 | Sp | 35.8  | 12 | 7.9   | -2.6  | 410  | -134  |
|             | -75.75 | 39.25 | Su | 9.1   | 22 | 5.3   | -3.6  | 275  | -185  |
|             | -75.75 | 39.25 | F  | 20.1  | 13 | 9.0   | -2.9  | 467  | -150  |
| Susquehann  | -76.25 | 39.25 | W  | 1259. | 5  | 10.6  | -6.1  | 8381 | -4836 |
|             | -76.25 | 39.25 | Sp | 1404. | 12 | 10.4  | -6.7  | 8234 | -5290 |
|             | -76.25 | 39.25 | Su | 356.2 | 22 | 4.3   | -3.1  | 3396 | -2447 |
|             | -76.25 | 39.25 | F  | 788   | 13 | 7.0   | -4.4  | 5508 | -3444 |
| Potomac     | -76.75 | 38.75 | W  | 538.1 | 5  | 28.7  | -16.9 | 3831 | -2258 |
|             | -76.75 | 38.75 | Sp | 443.1 | 13 | 19.9  | -13.7 | 2655 | -1827 |
|             | -76.75 | 38.75 | Su | 154.4 | 23 | 7.8   | -5.7  | 1037 | -766  |
|             | -76.75 | 38.75 | F  | 205.5 | 14 | 10.4  | -6.8  | 1382 | -906  |
| -           | -76.75 | 37.75 | W  | 75.3  | 9  | 16.2  | -8.2  | 589  | -296  |
|             | -76.75 | 37.75 | Sp | 62    | 14 | 12.0  | -6.9  | 437  | -249  |
|             | -76.75 | 37.75 | Su | 21.6  | 24 | 7.7   | -6.4  | 280  | -233  |
|             | -76.75 | 37.75 | F  | 28.8  | 16 | 7.0   | -5.1  | 255  | -187  |
| -           | -76.75 | 39.25 | W  | 147.7 | 5  | 48.0  | -28.8 | 650  | -390  |
|             | -76.75 | 39.25 | Sp | 121.7 | 12 | 51.5  | -33.7 | 698  | -457  |
|             | -76.75 | 39.25 | Su | 42.4  | 22 | 50.2  | -43.3 | 681  | -587  |
|             | -76.75 | 39.25 | F  | 56.4  | 13 | 44.8  | -32.7 | 608  | -444  |
| -           | -77.25 | 38.25 | W  | 62.6  | 5  | 10.8  | -4.7  | 525  | -226  |
|             | -77.25 | 38.25 | Sp | 51.6  | 13 | 6.5   | -3.8  | 315  | -185  |
|             | -77.25 | 38.25 | Su | 18    | 23 | 3.5   | -2.4  | 170  | -115  |
|             | -77.25 | 38.25 | F  | 23.9  | 14 | 3.7   | -2.3  | 181  | -111  |
| James River | -77.75 | 37.25 | W  | 481.3 | 9  | 21.6  | -13.8 | 2969 | -1905 |
|             | -77.75 | 37.25 | Sp | 334.7 | 14 | 14.9  | -9.7  | 2046 | -1334 |

|                  |        |       |    |       |    |       |       |      |       |
|------------------|--------|-------|----|-------|----|-------|-------|------|-------|
|                  | -77.75 | 37.25 | Su | 208   | 24 | 13.2  | -10.0 | 1813 | -1374 |
|                  | -77.75 | 37.25 | F  | 206.4 | 16 | 10.6  | -8.1  | 1459 | -1110 |
| <b>SAB</b>       |        |       |    |       |    |       |       |      |       |
| -                | -78.25 | 34.25 | W  | 229.3 | 21 | 129.4 | -70.2 | 1444 | -783  |
|                  | -78.25 | 34.25 | Sp | 226.7 | 24 | 141.5 | -69.0 | 1578 | -770  |
|                  | -78.25 | 34.25 | Su | 120.5 | 28 | 94.1  | -50.6 | 1050 | -565  |
|                  | -78.25 | 34.25 | F  | 144.8 | 25 | 125.1 | -59.9 | 1396 | -669  |
| -                | -79.25 | 33.25 | W  | 104.7 | 17 | 51.2  | -36.7 | 560  | -402  |
|                  | -79.25 | 33.25 | Sp | 59.6  | 22 | 32.6  | -24.3 | 357  | -266  |
|                  | -79.25 | 33.25 | Su | 43.7  | 27 | 49.5  | -49.5 | 541  | -541  |
|                  | -79.25 | 33.25 | F  | 45.7  | 22 | 40.5  | -35.5 | 443  | -389  |
| <b>Pee Dee</b>   | -79.25 | 33.75 | W  | 400.1 | 17 | 81.7  | -84.7 | 853  | -885  |
|                  | -79.25 | 33.75 | Sp | 395.5 | 22 | 97.7  | -87.6 | 1020 | -915  |
|                  | -79.25 | 33.75 | Su | 210.2 | 27 | 77.3  | -72.2 | 807  | -754  |
|                  | -79.25 | 33.75 | F  | 252.7 | 22 | 83.9  | -70.2 | 876  | -732  |
| -                | -79.75 | 33.25 | W  | 62.8  | 17 | 39.1  | -35.7 | 233  | -212  |
|                  | -79.75 | 33.25 | Sp | 35.8  | 22 | 31.4  | -20.5 | 187  | -122  |
|                  | -79.75 | 33.25 | Su | 26.2  | 27 | 39.5  | -39.3 | 235  | -234  |
|                  | -79.75 | 33.25 | F  | 27.4  | 22 | 41.6  | -35.8 | 248  | -213  |
| -                | -80.25 | 32.75 | W  | 57.7  | 17 | 61.6  | -39.8 | 357  | -231  |
|                  | -80.25 | 32.75 | Sp | 32.8  | 22 | 35.4  | -27.5 | 205  | -159  |
|                  | -80.25 | 32.75 | Su | 24.1  | 27 | 51.7  | -61.1 | 300  | -354  |
|                  | -80.25 | 32.75 | F  | 25.2  | 21 | 46.5  | -41.7 | 269  | -242  |
| <b>Santee</b>    | -80.25 | 33.25 | W  | 140.5 | 17 | 86.6  | -89.3 | 1845 | -1901 |
|                  | -80.25 | 33.25 | Sp | 79.9  | 22 | 57.6  | -52.8 | 1227 | -1125 |
|                  | -80.25 | 33.25 | Su | 58.6  | 27 | 54.3  | -53.7 | 1157 | -1144 |
|                  | -80.25 | 33.25 | F  | 61.3  | 22 | 52.3  | -48.9 | 1115 | -1042 |
| <b>Roanoke</b>   | -80.75 | 32.25 | W  | 39.3  | 17 | 13.2  | -5.7  | 223  | -95   |
|                  | -80.75 | 32.25 | Sp | 22.4  | 22 | 11.1  | -4.1  | 188  | -69   |
|                  | -80.75 | 32.25 | Su | 16.4  | 27 | 15.8  | -11.1 | 267  | -187  |
|                  | -80.75 | 32.25 | F  | 17.2  | 21 | 11.4  | -7.3  | 191  | -123  |
| -                | -80.75 | 32.75 | W  | 117.5 | 17 | 24.8  | -12.6 | 945  | -479  |
|                  | -80.75 | 32.75 | Sp | 66.9  | 22 | 17.7  | -7.4  | 672  | -281  |
|                  | -80.75 | 32.75 | Su | 49    | 27 | 23.0  | -15.1 | 873  | -575  |
|                  | -80.75 | 32.75 | F  | 51.2  | 21 | 17.0  | -10.9 | 646  | -414  |
| -                | -81.25 | 31.75 | W  | 98.5  | 14 | 26.8  | -20.6 | 572  | -441  |
|                  | -81.25 | 31.75 | Sp | 97.3  | 22 | 25.3  | -19.0 | 540  | -406  |
|                  | -81.25 | 31.75 | Su | 51.7  | 28 | 25.3  | -23.5 | 541  | -502  |
|                  | -81.25 | 31.75 | F  | 62.2  | 20 | 25.2  | -20.6 | 539  | -440  |
| <b>Savannah</b>  | -81.25 | 32.25 | W  | 521.3 | 17 | 52.0  | -41.3 | 1575 | -1252 |
|                  | -81.25 | 32.25 | Sp | 515.3 | 22 | 61.9  | -41.9 | 1874 | -1267 |
|                  | -81.25 | 32.25 | Su | 273.8 | 27 | 46.2  | -38.4 | 1397 | -1162 |
|                  | -81.25 | 32.25 | F  | 329.2 | 21 | 46.8  | -35.0 | 1416 | -1061 |
| -                | -81.75 | 30.75 | W  | 25.7  | 21 | 15.4  | -11.6 | 123  | -93   |
|                  | -81.75 | 30.75 | Sp | 25.4  | 25 | 13.1  | -9.1  | 105  | -73   |
|                  | -81.75 | 30.75 | Su | 13.5  | 28 | 23.4  | -22.2 | 188  | -178  |
|                  | -81.75 | 30.75 | F  | 16.2  | 25 | 18.1  | -15.7 | 146  | -126  |
| -                | -81.75 | 31.25 | W  | 24.4  | 14 | 4.4   | -3.0  | 132  | -90   |
|                  | -81.75 | 31.25 | Sp | 24.1  | 22 | 4.6   | -3.1  | 140  | -92   |
|                  | -81.75 | 31.25 | Su | 12.8  | 28 | 7.4   | -6.0  | 225  | -180  |
|                  | -81.75 | 31.25 | F  | 15.4  | 20 | 5.5   | -4.1  | 165  | -123  |
| <b>Althamaha</b> | -81.75 | 31.75 | W  | 479.2 | 14 | 48.8  | -41.7 | 636  | -543  |
|                  | -81.75 | 31.75 | Sp | 473.7 | 22 | 81.9  | -84.7 | 1066 | -1104 |
|                  | -81.75 | 31.75 | Su | 251.7 | 28 | 98.8  | -80.4 | 1287 | -1047 |
|                  | -81.75 | 31.75 | F  | 302.7 | 20 | 61.5  | -62.8 | 801  | -818  |
