# Supplementary material for: Air–water CO 2 evasion from US East Coast estuaries
Source: Copernicus journal article supplement (doi:10.5194/bg-14-2441-2017), 2017-05-15
Supplement: Supplementary file 2 [file Table S2.pdf › Table S2.pdf]

**Table S2:** Geometric properties of the estuaries simulated.  $L$ ,  $b$ ,  $H_{\text{down}}$ ,  $H_{\text{up}}$ ,  $B0$ , Tide amp and Wind correspond to the estuarine length, convergence length, downstream depth, upstream depth, upstream width, width at the mouth, tidal amplitude and average wind speed, respectively. W, Sp, Su, F correspond to winter, spring, summer and fall, respectively.

| System name      | long degrees | lat degree | Season | $L$ (m) | $b$ (m) | $H_{\text{down}}$ (m) | $H_{\text{up}}$ (m) | $B0$ (m) | Tide amp (m) | Wind ( $\text{m s}^{-1}$ ) |
|------------------|--------------|------------|--------|---------|---------|-----------------------|---------------------|----------|--------------|----------------------------|
| <b>NAR</b>       |              |            |        |         |         |                       |                     |          |              |                            |
| -                | -67.25       | 44.75      | W      | 14000   | 5170    | 8                     | 4                   | 1500     | 1.6          | 6.1                        |
|                  | -67.25       | 44.75      | Sp     | 14000   | 5170    | 8                     | 4                   | 1500     | 1.6          | 4.2                        |
|                  | -67.25       | 44.75      | Su     | 14000   | 5170    | 8                     | 4                   | 1500     | 1.6          | 3.7                        |
|                  | -67.25       | 44.75      | F      | 14000   | 5170    | 8                     | 4                   | 1500     | 1.6          | 5.9                        |
| -                | -67.25       | 45.25      | W      | 22000   | 9257    | 9.85                  | 4.925               | 1400     | 3.46         | 5.1                        |
|                  | -67.25       | 45.25      | Sp     | 22000   | 9257    | 9.85                  | 4.925               | 1400     | 3.46         | 3.8                        |
|                  | -67.25       | 45.25      | Su     | 22000   | 9257    | 9.85                  | 4.925               | 1400     | 3.46         | 3.4                        |
|                  | -67.25       | 45.25      | F      | 22000   | 9257    | 9.85                  | 4.925               | 1400     | 3.46         | 5                          |
| -                | -67.25       | 45.25      | W      | 10000   | 3760    | 9.85                  | 4.925               | 1000     | 3.46         | 5.7                        |
|                  | -67.25       | 45.25      | Sp     | 10000   | 3760    | 9.85                  | 4.925               | 1000     | 3.46         | 3.9                        |
|                  | -67.25       | 45.25      | Su     | 10000   | 3760    | 9.85                  | 4.925               | 1000     | 3.46         | 3.5                        |
|                  | -67.25       | 45.25      | F      | 10000   | 3760    | 9.85                  | 4.925               | 1000     | 3.46         | 5.6                        |
| -                | -67.75       | 44.75      | W      | 18000   | 7817    | 9.85                  | 4.925               | 2000     | 3.46         | 5.3                        |
|                  | -67.75       | 44.75      | Sp     | 18000   | 7817    | 9.85                  | 4.925               | 2000     | 3.46         | 3.7                        |
|                  | -67.75       | 44.75      | Su     | 18000   | 7817    | 9.85                  | 4.925               | 2000     | 3.46         | 3.2                        |
|                  | -67.75       | 44.75      | F      | 18000   | 7817    | 9.85                  | 4.925               | 2000     | 3.46         | 5.1                        |
| <b>Penobscot</b> |              |            |        |         |         |                       |                     |          |              |                            |
|                  | -68.25       | 44.75      | W      | 58000   | 18569   | 8                     | 4                   | 5000     | 3.19         | 4.8                        |
|                  | -68.25       | 44.75      | Sp     | 58000   | 18569   | 8                     | 4                   | 5000     | 3.19         | 3.4                        |
|                  | -68.25       | 44.75      | Su     | 58000   | 18569   | 8                     | 4                   | 5000     | 3.19         | 3                          |
|                  | -68.25       | 44.75      | F      | 58000   | 18569   | 8                     | 4                   | 5000     | 3.19         | 4.7                        |
| <b>Kennebec</b>  |              |            |        |         |         |                       |                     |          |              |                            |
|                  | -68.75       | 44.75      | W      | 74000   | 31895   | 6.27                  | 3.135               | 1730     | 1.69         | 4.8                        |
|                  | -68.75       | 44.75      | Sp     | 74000   | 31895   | 6.27                  | 3.135               | 1730     | 1.69         | 3.4                        |
|                  | -68.75       | 44.75      | Su     | 74000   | 31895   | 6.27                  | 3.135               | 1730     | 1.69         | 3                          |
|                  | -68.75       | 44.75      | F      | 74000   | 31895   | 6.27                  | 3.135               | 1730     | 1.69         | 4.7                        |
| -                | -69.75       | 44.25      | W      | 10000   | 4809    | 8                     | 4                   | 800      | 2.75         | 5.3                        |
|                  | -69.75       | 44.25      | Sp     | 10000   | 4809    | 8                     | 4                   | 800      | 2.75         | 3.7                        |
|                  | -69.75       | 44.25      | Su     | 10000   | 4809    | 8                     | 4                   | 800      | 2.75         | 3.2                        |
|                  | -69.75       | 44.25      | F      | 10000   | 4809    | 8                     | 4                   | 800      | 2.75         | 5.2                        |
| -                | -70.25       | 43.75      | W      | 50000   | 17469   | 10.05                 | 5.025               | 17500    | 1.11         | 6.5                        |
|                  | -70.25       | 43.75      | Sp     | 50000   | 17469   | 10.05                 | 5.025               | 17500    | 1.11         | 4.4                        |
|                  | -70.25       | 43.75      | Su     | 50000   | 17469   | 10.05                 | 5.025               | 17500    | 1.11         | 4                          |
|                  | -70.25       | 43.75      | F      | 50000   | 17469   | 10.05                 | 5.025               | 17500    | 1.11         | 6.2                        |
| -                | -70.75       | 41.75      | W      | 26000   | 5314    | 6.25                  | 3.125               | 12000    | 2.87         | 6.2                        |
|                  | -70.75       | 41.75      | Sp     | 26000   | 5314    | 6.25                  | 3.125               | 12000    | 2.87         | 4.2                        |
|                  | -70.75       | 41.75      | Su     | 26000   | 5314    | 6.25                  | 3.125               | 12000    | 2.87         | 3.8                        |
|                  | -70.75       | 41.75      | F      | 26000   | 5314    | 6.25                  | 3.125               | 12000    | 2.87         | 5.9                        |
| -                | -70.75       | 42.25      | W      | 50000   | 27906   | 3.96                  | 1.98                | 720      | 2.45         | 5.9                        |
|                  | -70.75       | 42.25      | Sp     | 50000   | 27906   | 3.96                  | 1.98                | 720      | 2.45         | 4                          |
|                  | -70.75       | 42.25      | Su     | 50000   | 27906   | 3.96                  | 1.98                | 720      | 2.45         | 3.5                        |
|                  | -70.75       | 42.25      | F      | 50000   | 27906   | 3.96                  | 1.98                | 720      | 2.45         | 5.7                        |
| <b>Merrimack</b> |              |            |        |         |         |                       |                     |          |              |                            |
|                  | -70.75       | 42.75      | W      | 50000   | 27906   | 3.96                  | 1.98                | 720      | 2.45         | 5.9                        |
|                  | -70.75       | 42.75      | Sp     | 50000   | 27906   | 3.96                  | 1.98                | 720      | 2.45         | 4                          |
|                  | -70.75       | 42.75      | Su     | 50000   | 27906   | 3.96                  | 1.98                | 720      | 2.45         | 3.5                        |
|                  | -70.75       | 42.75      | F      | 50000   | 27906   | 3.96                  | 1.98                | 720      | 2.45         | 5.7                        |
| <b>MAR</b>       |              |            |        |         |         |                       |                     |          |              |                            |
| -                | -70.75       | 43.25      | W      | 30000   | 8292    | 3.78                  | 1.89                | 3800     | 2.38         | 5.3                        |
|                  | -70.75       | 43.25      | Sp     | 30000   | 8292    | 3.78                  | 1.89                | 3800     | 2.38         | 3.6                        |
|                  | -70.75       | 43.25      | Su     | 30000   | 8292    | 3.78                  | 1.89                | 3800     | 2.38         | 3.2                        |
|                  | -70.75       | 43.25      | F      | 30000   | 8292    | 3.78                  | 1.89                | 3800     | 2.38         | 5                          |
| -                | -71.25       | 41.75      | W      | 62000   | 9914    | 8.31                  | 4.155               | 26000    | 1.19         | 6                          |
|                  | -71.25       | 41.75      | Sp     | 62000   | 9914    | 8.31                  | 4.155               | 26000    | 1.19         | 4.2                        |
|                  | -71.25       | 41.75      | Su     | 62000   | 9914    | 8.31                  | 4.155               | 26000    | 1.19         | 3.8                        |

|             |        |       |    |       |       |      |       |       |      |     |
|-------------|--------|-------|----|-------|-------|------|-------|-------|------|-----|
|             | -71.25 | 41.75 | F  | 62000 | 9914  | 8.31 | 4.155 | 26000 | 1.19 | 5.7 |
| -           | -71.75 | 41.25 | W  | 26000 | 9494  | 2.22 | 1.11  | 2320  | 0.82 | 6.5 |
|             | -71.75 | 41.25 | Sp | 26000 | 9494  | 2.22 | 1.11  | 2320  | 0.82 | 4.6 |
|             | -71.75 | 41.25 | Su | 26000 | 9494  | 2.22 | 1.11  | 2320  | 0.82 | 4.3 |
|             | -71.75 | 41.25 | F  | 26000 | 9494  | 2.22 | 1.11  | 2320  | 0.82 | 6.4 |
| -           | -72.75 | 40.75 | W  | 26000 | 11292 | 8    | 4     | 2000  | 1.6  | 6.5 |
|             | -72.75 | 40.75 | Sp | 26000 | 11292 | 8    | 4     | 2000  | 1.6  | 4.6 |
|             | -72.75 | 40.75 | Su | 26000 | 11292 | 8    | 4     | 2000  | 1.6  | 4.4 |
|             | -72.75 | 40.75 | F  | 26000 | 11292 | 8    | 4     | 2000  | 1.6  | 6.5 |
| -           | -72.75 | 41.25 | W  | 30000 | 24918 | 2.22 | 1.11  | 600   | 0.82 | 5.5 |
|             | -72.75 | 41.25 | Sp | 30000 | 24918 | 2.22 | 1.11  | 600   | 0.82 | 4   |
|             | -72.75 | 41.25 | Su | 30000 | 24918 | 2.22 | 1.11  | 600   | 0.82 | 3.8 |
|             | -72.75 | 41.25 | F  | 30000 | 24918 | 2.22 | 1.11  | 600   | 0.82 | 5.5 |
| Connecticut | -72.75 | 41.75 | W  | 86000 | 52164 | 2.22 | 1.11  | 1300  | 0.82 | 4.7 |
|             | -72.75 | 41.75 | Sp | 86000 | 52164 | 2.22 | 1.11  | 1300  | 0.82 | 3.5 |
|             | -72.75 | 41.75 | Su | 86000 | 52164 | 2.22 | 1.11  | 1300  | 0.82 | 3.3 |
|             | -72.75 | 41.75 | F  | 86000 | 52164 | 2.22 | 1.11  | 1300  | 0.82 | 4.6 |
| -           | -73.25 | 40.75 | W  | 86000 | 52164 | 2.22 | 1.11  | 1300  | 0.82 | 4.7 |
|             | -73.25 | 40.75 | Sp | 86000 | 52164 | 2.22 | 1.11  | 1300  | 0.82 | 3.5 |
|             | -73.25 | 40.75 | Su | 86000 | 52164 | 2.22 | 1.11  | 1300  | 0.82 | 3.3 |
|             | -73.25 | 40.75 | F  | 86000 | 52164 | 2.22 | 1.11  | 1300  | 0.82 | 4.6 |
| Hudson      | -74.25 | 40.75 | W  | 25800 | 60440 | 6.13 | 3.065 | 20000 | 1.39 | 4.7 |
|             | -74.25 | 40.75 | Sp | 25800 | 60440 | 6.13 | 3.065 | 20000 | 1.39 | 3.5 |
|             | -74.25 | 40.75 | Su | 25800 | 60440 | 6.13 | 3.065 | 20000 | 1.39 | 3.3 |
|             | -74.25 | 40.75 | F  | 25800 | 60440 | 6.13 | 3.065 | 20000 | 1.39 | 4.6 |
| -           | -75.25 | 37.75 | W  | 12200 | 24342 | 3.29 | 1.645 | 16520 | 0.67 | 5.3 |
|             | -75.25 | 37.75 | Sp | 12200 | 24342 | 3.29 | 1.645 | 16520 | 0.67 | 4.2 |
|             | -75.25 | 37.75 | Su | 12200 | 24342 | 3.29 | 1.645 | 16520 | 0.67 | 3.9 |
|             | -75.25 | 37.75 | F  | 12200 | 24342 | 3.29 | 1.645 | 16520 | 0.67 | 5.1 |
| -           | -75.25 | 38.75 | W  | 78000 | 17342 | 3.09 | 1.545 | 20660 | 0.5  | 5.5 |
|             | -75.25 | 38.75 | Sp | 78000 | 17342 | 3.09 | 1.545 | 20660 | 0.5  | 4.3 |
|             | -75.25 | 38.75 | Su | 78000 | 17342 | 3.09 | 1.545 | 20660 | 0.5  | 4   |
|             | -75.25 | 38.75 | F  | 78000 | 17342 | 3.09 | 1.545 | 20660 | 0.5  | 5.4 |
| Delaware    | -75.25 | 39.75 | W  | 21800 | 46034 | 6.12 | 3.06  | 37600 | 1.56 | 4.5 |
|             | -75.25 | 39.75 | Sp | 21800 | 46034 | 6.12 | 3.06  | 37600 | 1.56 | 3.5 |
|             | -75.25 | 39.75 | Su | 21800 | 46034 | 6.12 | 3.06  | 37600 | 1.56 | 3.2 |
|             | -75.25 | 39.75 | F  | 21800 | 46034 | 6.12 | 3.06  | 37600 | 1.56 | 4.3 |
| -           | -75.75 | 39.25 | W  | 70000 | 18675 | 3.47 | 1.735 | 12310 | 0.48 | 4.5 |
|             | -75.75 | 39.25 | Sp | 70000 | 18675 | 3.47 | 1.735 | 12310 | 0.48 | 3.5 |
|             | -75.75 | 39.25 | Su | 70000 | 18675 | 3.47 | 1.735 | 12310 | 0.48 | 3.2 |
|             | -75.75 | 39.25 | F  | 70000 | 18675 | 3.47 | 1.735 | 12310 | 0.48 | 4.3 |
| Susquehann  | -76.25 | 39.25 | W  | 32200 | 10222 | 7.33 | 3.665 | 35000 | 0.45 | 4   |
|             | -76.25 | 39.25 | Sp | 32200 | 10222 | 7.33 | 3.665 | 35000 | 0.45 | 3.2 |
|             | -76.25 | 39.25 | Su | 32200 | 10222 | 7.33 | 3.665 | 35000 | 0.45 | 2.8 |
|             | -76.25 | 39.25 | F  | 32200 | 10222 | 7.33 | 3.665 | 35000 | 0.45 | 3.8 |
| Potomac     | -76.75 | 38.75 | W  | 18200 | 37571 | 5.13 | 2.565 | 15240 | 0.55 | 3.4 |
|             | -76.75 | 38.75 | Sp | 18200 | 37571 | 5.13 | 2.565 | 15240 | 0.55 | 2.8 |
|             | -76.75 | 38.75 | Su | 18200 | 37571 | 5.13 | 2.565 | 15240 | 0.55 | 2.4 |
|             | -76.75 | 38.75 | F  | 18200 | 37571 | 5.13 | 2.565 | 15240 | 0.55 | 3.2 |
| -           | -76.75 | 37.75 | W  | 10200 | 33549 | 3.82 | 1.91  | 4810  | 0.82 | 3.9 |
|             | -76.75 | 37.75 | Sp | 10200 | 33549 | 3.82 | 1.91  | 4810  | 0.82 | 3.3 |
|             | -76.75 | 37.75 | Su | 10200 | 33549 | 3.82 | 1.91  | 4810  | 0.82 | 2.9 |
|             | -76.75 | 37.75 | F  | 10200 | 33549 | 3.82 | 1.91  | 4810  | 0.82 | 3.6 |
| -           | -76.75 | 39.25 | W  | 62000 | 53019 | 3.78 | 1.89  | 1610  | 0.52 | 3.7 |
|             | -76.75 | 39.25 | Sp | 62000 | 53019 | 3.78 | 1.89  | 1610  | 0.52 | 3   |
|             | -76.75 | 39.25 | Su | 62000 | 53019 | 3.78 | 1.89  | 1610  | 0.52 | 2.6 |
|             | -76.75 | 39.25 | F  | 62000 | 53019 | 3.78 | 1.89  | 1610  | 0.52 | 3.5 |
| -           | -77.25 | 38.25 | W  | 16200 | 33642 | 3.75 | 1.875 | 6170  | 0.53 | 3.4 |
|             | -77.25 | 38.25 | Sp | 16200 | 33642 | 3.75 | 1.875 | 6170  | 0.53 | 2.9 |
|             | -77.25 | 38.25 | Su | 16200 | 33642 | 3.75 | 1.875 | 6170  | 0.53 | 2.5 |
|             | -77.25 | 38.25 | F  | 16200 | 33642 | 3.75 | 1.875 | 6170  | 0.53 | 3.2 |

|             |        |       |    |       |       |      |       |       |      |     |
|-------------|--------|-------|----|-------|-------|------|-------|-------|------|-----|
| James River | -77.75 | 37.25 | W  | 17800 | 34659 | 3.22 | 1.61  | 17000 | 0.8  | 3.9 |
|             | -77.75 | 37.25 | Sp | 17800 | 34659 | 3.22 | 1.61  | 17000 | 0.8  | 3.3 |
|             | -77.75 | 37.25 | Su | 17800 | 34659 | 3.22 | 1.61  | 17000 | 0.8  | 2.9 |
|             | -77.75 | 37.25 | F  | 17800 | 34659 | 3.22 | 1.61  | 17000 | 0.8  | 3.6 |
| SAB         |        |       |    |       |       |      |       |       |      |     |
| -           | -78.25 | 34.25 | W  | 50000 | 31982 | 2.45 | 1.225 | 1910  | 1.06 | 4.5 |
|             | -78.25 | 34.25 | Sp | 50000 | 31982 | 2.45 | 1.225 | 1910  | 1.06 | 4   |
|             | -78.25 | 34.25 | Su | 50000 | 31982 | 2.45 | 1.225 | 1910  | 1.06 | 3.7 |
|             | -78.25 | 34.25 | F  | 50000 | 31982 | 2.45 | 1.225 | 1910  | 1.06 | 4.3 |
| -           | -79.25 | 33.25 | W  | 62000 | 23086 | 5.05 | 2.525 | 2200  | 0.85 | 5.4 |
|             | -79.25 | 33.25 | Sp | 62000 | 23086 | 5.05 | 2.525 | 2200  | 0.85 | 4.7 |
|             | -79.25 | 33.25 | Su | 62000 | 23086 | 5.05 | 2.525 | 2200  | 0.85 | 4.4 |
|             | -79.25 | 33.25 | F  | 62000 | 23086 | 5.05 | 2.525 | 2200  | 0.85 | 5.2 |
| Pee Dee     | -79.25 | 33.75 | W  | 58000 | 22129 | 5.05 | 2.525 | 2200  | 0.85 | 4.5 |
|             | -79.25 | 33.75 | Sp | 58000 | 22129 | 5.05 | 2.525 | 2200  | 0.85 | 4   |
|             | -79.25 | 33.75 | Su | 58000 | 22129 | 5.05 | 2.525 | 2200  | 0.85 | 3.7 |
|             | -79.25 | 33.75 | F  | 58000 | 22129 | 5.05 | 2.525 | 2200  | 0.85 | 4.3 |
| -           | -79.75 | 33.25 | W  | 24000 | 8788  | 2    | 1     | 3070  | 1.09 | 4.6 |
|             | -79.75 | 33.25 | Sp | 24000 | 8788  | 2    | 1     | 3070  | 1.09 | 4   |
|             | -79.75 | 33.25 | Su | 24000 | 8788  | 2    | 1     | 3070  | 1.09 | 3.8 |
|             | -79.75 | 33.25 | F  | 24000 | 8788  | 2    | 1     | 3070  | 1.09 | 4.4 |
| -           | -80.25 | 32.75 | W  | 38000 | 13937 | 6.29 | 3.145 | 1910  | 1.84 | 4.8 |
|             | -80.25 | 32.75 | Sp | 38000 | 13937 | 6.29 | 3.145 | 1910  | 1.84 | 4.2 |
|             | -80.25 | 32.75 | Su | 38000 | 13937 | 6.29 | 3.145 | 1910  | 1.84 | 4   |
|             | -80.25 | 32.75 | F  | 38000 | 13937 | 6.29 | 3.145 | 1910  | 1.84 | 4.6 |
| Santee      | -80.25 | 33.25 | W  | 58000 | 19361 | 4.99 | 2.495 | 5000  | 1.45 | 4.1 |
|             | -80.25 | 33.25 | Sp | 58000 | 19361 | 4.99 | 2.495 | 5000  | 1.45 | 3.7 |
|             | -80.25 | 33.25 | Su | 58000 | 19361 | 4.99 | 2.495 | 5000  | 1.45 | 3.4 |
|             | -80.25 | 33.25 | F  | 58000 | 19361 | 4.99 | 2.495 | 5000  | 1.45 | 3.9 |
| Roanoke     | -80.75 | 32.25 | W  | 50000 | 7254  | 5.03 | 2.515 | 9850  | 2.23 | 4.8 |
|             | -80.75 | 32.25 | Sp | 50000 | 7254  | 5.03 | 2.515 | 9850  | 2.23 | 4.4 |
|             | -80.75 | 32.25 | Su | 50000 | 7254  | 5.03 | 2.515 | 9850  | 2.23 | 4.3 |
|             | -80.75 | 32.25 | F  | 50000 | 7254  | 5.03 | 2.515 | 9850  | 2.23 | 4.8 |
| -           | -80.75 | 32.75 | W  | 58000 | 14033 | 3.55 | 1.775 | 11850 | 1.73 | 4.2 |
|             | -80.75 | 32.75 | Sp | 58000 | 14033 | 3.55 | 1.775 | 11850 | 1.73 | 3.8 |
|             | -80.75 | 32.75 | Su | 58000 | 14033 | 3.55 | 1.775 | 11850 | 1.73 | 3.6 |
|             | -80.75 | 32.75 | F  | 58000 | 14033 | 3.55 | 1.775 | 11850 | 1.73 | 4.1 |
| -           | -81.25 | 31.75 | W  | 58000 | 15723 | 3.35 | 1.675 | 6000  | 1.93 | 4.4 |
|             | -81.25 | 31.75 | Sp | 58000 | 15723 | 3.35 | 1.675 | 6000  | 1.93 | 4.1 |
|             | -81.25 | 31.75 | Su | 58000 | 15723 | 3.35 | 1.675 | 6000  | 1.93 | 4   |
|             | -81.25 | 31.75 | F  | 58000 | 15723 | 3.35 | 1.675 | 6000  | 1.93 | 4.5 |
| Savannah    | -81.25 | 32.25 | W  | 58000 | 13999 | 3.08 | 1.54  | 9450  | 2.06 | 4.2 |
|             | -81.25 | 32.25 | Sp | 58000 | 13999 | 3.08 | 1.54  | 9450  | 2.06 | 3.8 |
|             | -81.25 | 32.25 | Su | 58000 | 13999 | 3.08 | 1.54  | 9450  | 2.06 | 3.7 |
|             | -81.25 | 32.25 | F  | 58000 | 13999 | 3.08 | 1.54  | 9450  | 2.06 | 4.1 |
| -           | -81.75 | 30.75 | W  | 38000 | 12984 | 3.34 | 1.67  | 2800  | 1.75 | 3.8 |
|             | -81.75 | 30.75 | Sp | 38000 | 12984 | 3.34 | 1.67  | 2800  | 1.75 | 3.4 |
|             | -81.75 | 30.75 | Su | 38000 | 12984 | 3.34 | 1.67  | 2800  | 1.75 | 3.2 |
|             | -81.75 | 30.75 | F  | 38000 | 12984 | 3.34 | 1.67  | 2800  | 1.75 | 3.8 |
| -           | -81.75 | 31.25 | W  | 66000 | 16597 | 3.87 | 1.935 | 8000  | 2.13 | 3.7 |
|             | -81.75 | 31.25 | Sp | 66000 | 16597 | 3.87 | 1.935 | 8000  | 2.13 | 3.4 |
|             | -81.75 | 31.25 | Su | 66000 | 16597 | 3.87 | 1.935 | 8000  | 2.13 | 3.3 |
|             | -81.75 | 31.25 | F  | 66000 | 16597 | 3.87 | 1.935 | 8000  | 2.13 | 3.8 |
| Althamaha   | -81.75 | 31.75 | W  | 42000 | 14020 | 1.96 | 0.98  | 4200  | 1.9  | 3.7 |
|             | -81.75 | 31.75 | Sp | 42000 | 14020 | 1.96 | 0.98  | 4200  | 1.9  | 3.4 |
|             | -81.75 | 31.75 | Su | 42000 | 14020 | 1.96 | 0.98  | 4200  | 1.9  | 3.2 |
|             | -81.75 | 31.75 | F  | 42000 | 14020 | 1.96 | 0.98  | 4200  | 1.9  | 3.6 |
