# Supplementary material for: Air–water CO 2 evasion from US East Coast estuaries
Source: Copernicus journal article supplement (doi:10.5194/bg-14-2441-2017), 2017-05-15
Supplement: Supplementary file 4 [file Table S4.pdf › Table S4.pdf]

**Table S4:** Downstream boundary conditions for nutrients and phytoplankton. W, Sp, Su, F correspond to winter, spring, summer and fall, respectively.

| System name      | long degrees | lat degree | Season | Phy ( $\mu\text{M C}$ ) | Si ( $\mu\text{M Si}$ ) | NO <sub>3</sub> ( $\mu\text{M N}$ ) | NH <sub>4</sub> ( $\mu\text{M N}$ ) | PO <sub>4</sub> ( $\mu\text{M P}$ ) | O <sub>2</sub> ( $\mu\text{M O}$ ) |
|------------------|--------------|------------|--------|-------------------------|-------------------------|-------------------------------------|-------------------------------------|-------------------------------------|------------------------------------|
| <b>NAR</b>       |              |            |        |                         |                         |                                     |                                     |                                     |                                    |
| -                | -67.25       | 44.75      | W      | 0                       | 6                       | 45.43                               | 0.504                               | 0.871                               | 336                                |
|                  | -67.25       | 44.75      | Sp     | 0                       | 1.622                   | 17.78                               | 0.197                               | 0.536                               | 333                                |
|                  | -67.25       | 44.75      | Su     | 0                       | 3.14                    | 20.58                               | 0.228                               | 0.512                               | 281                                |
|                  | -67.25       | 44.75      | F      | 0                       | 5.485                   | 56.17                               | 0.624                               | 0.737                               | 284                                |
| -                | -67.25       | 45.25      | W      | 0                       | 6                       | 45.43                               | 0.504                               | 0.871                               | 336                                |
|                  | -67.25       | 45.25      | Sp     | 0                       | 1.622                   | 17.78                               | 0.197                               | 0.536                               | 333                                |
|                  | -67.25       | 45.25      | Su     | 0                       | 3.14                    | 20.58                               | 0.228                               | 0.512                               | 281                                |
|                  | -67.25       | 45.25      | F      | 0                       | 5.485                   | 56.17                               | 0.624                               | 0.737                               | 284                                |
| -                | -67.25       | 45.25      | W      | 0                       | 6                       | 45.43                               | 0.504                               | 0.871                               | 336                                |
|                  | -67.25       | 45.25      | Sp     | 0                       | 1.622                   | 17.78                               | 0.197                               | 0.536                               | 333                                |
|                  | -67.25       | 45.25      | Su     | 0                       | 3.14                    | 20.58                               | 0.228                               | 0.512                               | 281                                |
|                  | -67.25       | 45.25      | F      | 0                       | 5.485                   | 56.17                               | 0.624                               | 0.737                               | 284                                |
| -                | -67.75       | 44.75      | W      | 0                       | 6                       | 45.43                               | 0.504                               | 0.871                               | 336                                |
|                  | -67.75       | 44.75      | Sp     | 0                       | 1.622                   | 17.78                               | 0.197                               | 0.536                               | 333                                |
|                  | -67.75       | 44.75      | Su     | 0                       | 3.14                    | 20.58                               | 0.228                               | 0.512                               | 281                                |
|                  | -67.75       | 44.75      | F      | 0                       | 5.485                   | 56.17                               | 0.624                               | 0.737                               | 284                                |
| <b>Penobscot</b> | -68.25       | 44.75      | W      | 0                       | 6                       | 45.43                               | 0.504                               | 0.871                               | 336                                |
|                  | -68.25       | 44.75      | Sp     | 0                       | 1.622                   | 17.78                               | 0.197                               | 0.536                               | 333                                |
|                  | -68.25       | 44.75      | Su     | 0                       | 3.14                    | 20.58                               | 0.228                               | 0.512                               | 281                                |
|                  | -68.25       | 44.75      | F      | 0                       | 5.485                   | 56.17                               | 0.624                               | 0.737                               | 284                                |
| <b>Kennebec</b>  | -68.75       | 44.75      | W      | 0                       | 6                       | 45.43                               | 0.504                               | 0.871                               | 336                                |
|                  | -68.75       | 44.75      | Sp     | 0                       | 1.622                   | 17.78                               | 0.197                               | 0.536                               | 333                                |
|                  | -68.75       | 44.75      | Su     | 0                       | 3.14                    | 20.58                               | 0.228                               | 0.512                               | 281                                |
|                  | -68.75       | 44.75      | F      | 0                       | 5.485                   | 56.17                               | 0.624                               | 0.737                               | 284                                |
| -                | -69.75       | 44.25      | W      | 0                       | 6                       | 45.43                               | 0.504                               | 0.871                               | 336                                |
|                  | -69.75       | 44.25      | Sp     | 0                       | 1.622                   | 17.78                               | 0.197                               | 0.536                               | 333                                |
|                  | -69.75       | 44.25      | Su     | 0                       | 3.14                    | 20.58                               | 0.228                               | 0.512                               | 281                                |
|                  | -69.75       | 44.25      | F      | 0                       | 5.485                   | 56.17                               | 0.624                               | 0.737                               | 284                                |
| -                | -70.25       | 43.75      | W      | 0                       | 5.091                   | 71.74                               | 0.797                               | 0.737                               | 307                                |
|                  | -70.25       | 43.75      | Sp     | 0                       | 1.773                   | 12.97                               | 0.144                               | 0.392                               | 332                                |
|                  | -70.25       | 43.75      | Su     | 0                       | 1.472                   | 0.528                               | 0.058                               | 0.246                               | 272                                |
|                  | -70.25       | 43.75      | F      | 0                       | 5.182                   | 4.797                               | 0.533                               | 0.453                               | 276                                |
| -                | -70.75       | 41.75      | W      | 0                       | 8.615                   | 83.43                               | 0.927                               | 0.866                               | 315                                |
|                  | -70.75       | 41.75      | Sp     | 0                       | 4.986                   | 34.37                               | 0.381                               | 0.594                               | 324                                |
|                  | -70.75       | 41.75      | Su     | 0                       | 2.009                   | 0.495                               | 0.055                               | 0.226                               | 261                                |
|                  | -70.75       | 41.75      | F      | 0                       | 3.764                   | 36.60                               | 0.406                               | 0.527                               | 286                                |
| -                | -70.75       | 42.25      | W      | 0                       | 8.615                   | 83.43                               | 0.927                               | 0.866                               | 315                                |
|                  | -70.75       | 42.25      | Sp     | 0                       | 4.986                   | 34.37                               | 0.381                               | 0.594                               | 324                                |
|                  | -70.75       | 42.25      | Su     | 0                       | 2.009                   | 0.495                               | 0.055                               | 0.226                               | 261                                |
|                  | -70.75       | 42.25      | F      | 0                       | 3.764                   | 36.60                               | 0.406                               | 0.527                               | 286                                |
| <b>Merrimack</b> | -70.75       | 42.75      | W      | 0                       | 8.615                   | 83.43                               | 0.927                               | 0.866                               | 315                                |
|                  | -70.75       | 42.75      | Sp     | 0                       | 4.986                   | 34.37                               | 0.381                               | 0.594                               | 324                                |
|                  | -70.75       | 42.75      | Su     | 0                       | 2.009                   | 0.495                               | 0.055                               | 0.226                               | 261                                |
|                  | -70.75       | 42.75      | F      | 0                       | 3.764                   | 36.60                               | 0.406                               | 0.527                               | 286                                |
| <b>MAR</b>       |              |            |        |                         |                         |                                     |                                     |                                     |                                    |
| -                | -70.75       | 43.25      | W      | 0                       | 8.484                   | 65.06                               | 0.722                               | 0.793                               | 328                                |
|                  | -70.75       | 43.25      | Sp     | 0                       | 4.133                   | 34.59                               | 0.384                               | 0.71                                | 337                                |
|                  | -70.75       | 43.25      | Su     | 0                       | 1.937                   | 0.297                               | 0.033                               | 0.228                               | 291                                |
|                  | -70.75       | 43.25      | F      | 0                       | 8                       | 10.89                               | 1.21                                | 0.717                               | 287                                |
| -                | -71.25       | 41.75      | W      | 0                       | 5.091                   | 71.74                               | 0.797                               | 0.737                               | 307                                |
|                  | -71.25       | 41.75      | Sp     | 0                       | 1.773                   | 12.97                               | 0.144                               | 0.392                               | 332                                |
|                  | -71.25       | 41.75      | Su     | 0                       | 1.472                   | 0.528                               | 0.058                               | 0.246                               | 272                                |
|                  | -71.25       | 41.75      | F      | 0                       | 5.182                   | 4.797                               | 0.533                               | 0.453                               | 276                                |
| -                | -71.75       | 41.25      | W      | 0                       | 5.091                   | 71.74                               | 0.797                               | 0.737                               | 307                                |

|             |        |       |    |   |       |       |       |       |     |
|-------------|--------|-------|----|---|-------|-------|-------|-------|-----|
|             | -71.75 | 41.25 | Sp | 0 | 1.773 | 12.97 | 0.144 | 0.392 | 332 |
|             | -71.75 | 41.25 | Su | 0 | 1.472 | 0.528 | 0.058 | 0.246 | 272 |
|             | -71.75 | 41.25 | F  | 0 | 5.182 | 4.797 | 0.533 | 0.453 | 276 |
| -           | -72.75 | 40.75 | W  | 0 | 1.123 | 21.86 | 0.242 | 0.726 | 300 |
|             | -72.75 | 40.75 | Sp | 0 | 1.153 | 0.619 | 0.068 | 0.346 | 302 |
|             | -72.75 | 40.75 | Su | 0 | 0.895 | 0.161 | 0.017 | 0.23  | 248 |
|             | -72.75 | 40.75 | F  | 0 | 1.189 | 10.91 | 0.121 | 0.436 | 266 |
| -           | -72.75 | 41.25 | W  | 0 | 5.091 | 71.74 | 0.797 | 0.737 | 307 |
|             | -72.75 | 41.25 | Sp | 0 | 1.773 | 12.97 | 0.144 | 0.392 | 332 |
|             | -72.75 | 41.25 | Su | 0 | 1.472 | 0.528 | 0.058 | 0.246 | 272 |
|             | -72.75 | 41.25 | F  | 0 | 5.182 | 4.797 | 0.533 | 0.453 | 276 |
| Connecticut | -72.75 | 41.75 | W  | 0 | 5.091 | 71.74 | 0.797 | 0.737 | 307 |
|             | -72.75 | 41.75 | Sp | 0 | 1.773 | 12.97 | 0.144 | 0.392 | 332 |
|             | -72.75 | 41.75 | Su | 0 | 1.472 | 0.528 | 0.058 | 0.246 | 272 |
|             | -72.75 | 41.75 | F  | 0 | 5.182 | 4.797 | 0.533 | 0.453 | 276 |
| -           | -73.25 | 40.75 | W  | 0 | 5.091 | 71.74 | 0.797 | 0.737 | 307 |
|             | -73.25 | 40.75 | Sp | 0 | 1.773 | 12.97 | 0.144 | 0.392 | 332 |
|             | -73.25 | 40.75 | Su | 0 | 1.472 | 0.528 | 0.058 | 0.246 | 272 |
|             | -73.25 | 40.75 | F  | 0 | 5.182 | 4.797 | 0.533 | 0.453 | 276 |
| Hudson      | -74.25 | 40.75 | W  | 0 | 1.123 | 21.86 | 0.242 | 0.726 | 300 |
|             | -74.25 | 40.75 | Sp | 0 | 1.153 | 0.619 | 0.068 | 0.346 | 302 |
|             | -74.25 | 40.75 | Su | 0 | 0.895 | 0.161 | 0.017 | 0.23  | 248 |
|             | -74.25 | 40.75 | F  | 0 | 1.189 | 10.91 | 0.121 | 0.436 | 27  |
| -           | -75.25 | 37.75 | W  | 0 | 1     | 0.09  | 0.01  | 0.693 | 32  |
|             | -75.25 | 37.75 | Sp | 0 | 1.037 | 0.199 | 0.022 | 0.16  | 288 |
|             | -75.25 | 37.75 | Su | 0 | 1.119 | 0.215 | 0.023 | 0.324 | 240 |
|             | -75.25 | 37.75 | F  | 0 | 1.03  | 0.398 | 0.044 | 0.259 | 259 |
| -           | -75.25 | 38.75 | W  | 0 | 1     | 0.09  | 0.01  | 0.693 | 316 |
|             | -75.25 | 38.75 | Sp | 0 | 1.037 | 0.199 | 0.022 | 0.16  | 288 |
|             | -75.25 | 38.75 | Su | 0 | 1.119 | 0.215 | 0.023 | 0.324 | 240 |
|             | -75.25 | 38.75 | F  | 0 | 1     | 0.398 | 0.044 | 0.259 | 259 |
| Delaware    | -75.25 | 39.75 | W  | 0 | 0.174 | 14.26 | 0.158 | 0.563 | 306 |
|             | -75.25 | 39.75 | Sp | 0 | 0.73  | 0.205 | 0.022 | 0.2   | 301 |
|             | -75.25 | 39.75 | Su | 0 | 0.747 | 0.153 | 0.017 | 0.243 | 241 |
|             | -75.25 | 39.75 | F  | 0 | 1.199 | 10.60 | 0.117 | 0.417 | 265 |
| -           | -75.75 | 39.25 | W  | 0 | 0.174 | 14.26 | 0.158 | 0.563 | 306 |
|             | -75.75 | 39.25 | Sp | 0 | 0.73  | 0.205 | 0.022 | 0.2   | 301 |
|             | -75.75 | 39.25 | Su | 0 | 0.747 | 0.153 | 0.017 | 0.243 | 241 |
|             | -75.75 | 39.25 | F  | 0 | 1.199 | 10.60 | 0.117 | 0.417 | 265 |
| Susquehann  | -76.25 | 39.25 | W  | 0 | 0.174 | 14.26 | 0.158 | 0.563 | 306 |
|             | -76.25 | 39.25 | Sp | 0 | 0.73  | 0.205 | 0.022 | 0.2   | 301 |
|             | -76.25 | 39.25 | Su | 0 | 0.747 | 0.153 | 0.017 | 0.243 | 241 |
|             | -76.25 | 39.25 | F  | 0 | 1.199 | 10.60 | 0.117 | 0.417 | 265 |
| Potomac     | -76.75 | 38.75 | W  | 0 | 1     | 0.09  | 0.01  | 0.693 | 316 |
|             | -76.75 | 38.75 | Sp | 0 | 1.037 | 0.199 | 0.022 | 0.16  | 288 |
|             | -76.75 | 38.75 | Su | 0 | 1.119 | 0.215 | 0.023 | 0.324 | 240 |
|             | -76.75 | 38.75 | F  | 0 | 1     | 0.398 | 0.044 | 0.259 | 259 |
| -           | -76.75 | 37.75 | W  | 0 | 1     | 0.09  | 0.01  | 0.63  | 270 |
|             | -76.75 | 37.75 | Sp | 0 | 1.2   | 0.199 | 0.022 | 0.36  | 282 |
|             | -76.75 | 37.75 | Su | 0 | 1     | 0.175 | 0.019 | 0.23  | 234 |
|             | -76.75 | 37.75 | F  | 0 | 1.2   | 0.469 | 0.052 | 0.305 | 247 |
| -           | -76.75 | 39.25 | W  | 0 | 0.174 | 14.26 | 0.158 | 0.563 | 306 |
|             | -76.75 | 39.25 | Sp | 0 | 0.73  | 0.205 | 0.022 | 0.2   | 301 |
|             | -76.75 | 39.25 | Su | 0 | 0.747 | 0.153 | 0.017 | 0.243 | 241 |
|             | -76.75 | 39.25 | F  | 0 | 1.199 | 10.60 | 0.117 | 0.417 | 265 |
| -           | -77.25 | 38.25 | W  | 0 | 1     | 0.09  | 0.01  | 0.693 | 316 |
|             | -77.25 | 38.25 | Sp | 0 | 1.037 | 0.199 | 0.022 | 0.16  | 288 |
|             | -77.25 | 38.25 | Su | 0 | 1.119 | 0.215 | 0.023 | 0.324 | 240 |
|             | -77.25 | 38.25 | F  | 0 | 1     | 0.398 | 0.044 | 0.259 | 259 |
| James River | -77.75 | 37.25 | W  | 0 | 1     | 0.09  | 0.01  | 0.693 | 316 |
|             | -77.75 | 37.25 | Sp | 0 | 1.037 | 0.199 | 0.022 | 0.16  | 288 |

|                  |        |       |    |   |       |       |       |       |        |
|------------------|--------|-------|----|---|-------|-------|-------|-------|--------|
|                  | -77.75 | 37.25 | Su | 0 | 1.119 | 0.215 | 0.023 | 0.324 | 240    |
|                  | -77.75 | 37.25 | F  | 0 | 1.2   | 0.398 | 0.044 | 0.259 | 259    |
| <b>SAB</b>       |        |       |    |   |       |       |       |       |        |
| -                | -78.25 | 34.25 | W  | 0 | 1.368 | 0.504 | 0.056 | 0.177 | 220    |
|                  | -78.25 | 34.25 | Sp | 0 | 1.375 | 0.116 | 0.012 | 0.167 | 211    |
|                  | -78.25 | 34.25 | Su | 0 | 1.014 | 0.295 | 0.032 | 0.051 | 209    |
|                  | -78.25 | 34.25 | F  | 0 | 1.379 | 0.368 | 0.040 | 0.1   | 207    |
| -                | -79.25 | 33.25 | W  | 0 | 0.914 | 0.915 | 0.101 | 0.069 | 231.92 |
|                  | -79.25 | 33.25 | Sp | 0 | 1.046 | 0.191 | 0.021 | 0.199 | 209    |
|                  | -79.25 | 33.25 | Su | 0 | 1.217 | 0.197 | 0.021 | 0.036 | 197    |
|                  | -79.25 | 33.25 | F  | 0 | 1.077 | 0.054 | 0.006 | 0.086 | 217    |
| <b>Pee Dee</b>   | -79.25 | 33.75 | W  | 0 | 0.914 | 0.915 | 0.101 | 0.069 | 231.92 |
|                  | -79.25 | 33.75 | Sp | 0 | 1.046 | 0.191 | 0.021 | 0.199 | 209    |
|                  | -79.25 | 33.75 | Su | 0 | 1.217 | 0.197 | 0.021 | 0.036 | 197    |
|                  | -79.25 | 33.75 | F  | 0 | 1.077 | 0.054 | 0.006 | 0.086 | 217    |
| -                | -79.75 | 33.25 | W  | 0 | 0.914 | 0.915 | 0.101 | 0.069 | 231.92 |
|                  | -79.75 | 33.25 | Sp | 0 | 1.046 | 0.191 | 0.021 | 0.199 | 209    |
|                  | -79.75 | 33.25 | Su | 0 | 1.217 | 0.197 | 0.021 | 0.036 | 197    |
|                  | -79.75 | 33.25 | F  | 0 | 1.077 | 0.054 | 0.006 | 0.086 | 217    |
| -                | -80.25 | 32.75 | W  | 0 | 0.889 | 0.851 | 0.094 | 0.121 | 239    |
|                  | -80.25 | 32.75 | Sp | 0 | 0.6   | 0.182 | 0.020 | 0.095 | 223    |
|                  | -80.25 | 32.75 | Su | 0 | 1.204 | 0.233 | 0.025 | 0.085 | 203    |
|                  | -80.25 | 32.75 | F  | 0 | 0.258 | 0.048 | 0.005 | 0.048 | 217    |
| <b>Santee</b>    | -80.25 | 33.25 | W  | 0 | 0.914 | 0.915 | 0.101 | 0.069 | 231    |
|                  | -80.25 | 33.25 | Sp | 0 | 1.046 | 0.191 | 0.021 | 0.199 | 209    |
|                  | -80.25 | 33.25 | Su | 0 | 1.217 | 0.197 | 0.021 | 0.036 | 197    |
|                  | -80.25 | 33.25 | F  | 0 | 1.077 | 0.054 | 0.006 | 0.086 | 217    |
| <b>Roanoke</b>   | -80.75 | 32.25 | W  | 0 | 0.889 | 0.851 | 0.094 | 0.121 | 239    |
|                  | -80.75 | 32.25 | Sp | 0 | 0.6   | 0.182 | 0.020 | 0.095 | 223    |
|                  | -80.75 | 32.25 | Su | 0 | 1.204 | 0.233 | 0.025 | 0.085 | 203    |
|                  | -80.75 | 32.25 | F  | 0 | 0.258 | 0.048 | 0.005 | 0.048 | 217    |
| -                | -80.75 | 32.75 | W  | 0 | 0.889 | 0.851 | 0.094 | 0.121 | 239    |
|                  | -80.75 | 32.75 | Sp | 0 | 0.6   | 0.182 | 0.020 | 0.095 | 223    |
|                  | -80.75 | 32.75 | Su | 0 | 1.204 | 0.233 | 0.025 | 0.085 | 203    |
|                  | -80.75 | 32.75 | F  | 0 | 0.258 | 0.048 | 0.005 | 0.048 | 217    |
| -                | -81.25 | 31.75 | W  | 0 | 1.351 | 0.241 | 0.026 | 0.248 | 256    |
|                  | -81.25 | 31.75 | Sp | 0 | 0.53  | 0.099 | 0.011 | 0.263 | 230    |
|                  | -81.25 | 31.75 | Su | 0 | 1.821 | 0.129 | 0.014 | 0.145 | 202    |
|                  | -81.25 | 31.75 | F  | 0 | 0.497 | 0.063 | 0.007 | 0.115 | 229    |
| <b>Savannah</b>  | -81.25 | 32.25 | W  | 0 | 0.889 | 0.851 | 0.094 | 0.121 | 239    |
|                  | -81.25 | 32.25 | Sp | 0 | 0.6   | 0.182 | 0.020 | 0.095 | 223    |
|                  | -81.25 | 32.25 | Su | 0 | 1.204 | 0.233 | 0.025 | 0.085 | 203    |
|                  | -81.25 | 32.25 | F  | 0 | 0.258 | 0.048 | 0.005 | 0.048 | 217    |
| -                | -81.75 | 30.75 | W  | 0 | 1.061 | 0.531 | 0.059 | 0.149 | 223    |
|                  | -81.75 | 30.75 | Sp | 0 | 0.778 | 0.157 | 0.017 | 0.191 | 211    |
|                  | -81.75 | 30.75 | Su | 0 | 1.13  | 0.200 | 0.022 | 0.085 | 197    |
|                  | -81.75 | 30.75 | F  | 0 | 1.2   | 0.075 | 0.008 | 0.129 | 214    |
| -                | -81.75 | 31.25 | W  | 0 | 1.351 | 0.241 | 0.026 | 0.248 | 256    |
|                  | -81.75 | 31.25 | Sp | 0 | 0.53  | 0.099 | 0.011 | 0.263 | 230    |
|                  | -81.75 | 31.25 | Su | 0 | 1.821 | 0.129 | 0.014 | 0.145 | 202    |
|                  | -81.75 | 31.25 | F  | 0 | 0.497 | 0.063 | 0.007 | 0.115 | 229    |
| <b>Althamaha</b> | -81.75 | 31.75 | W  | 0 | 1.351 | 0.241 | 0.026 | 0.248 | 256    |
|                  | -81.75 | 31.75 | Sp | 0 | 0.53  | 0.099 | 0.011 | 0.263 | 230    |
|                  | -81.75 | 31.75 | Su | 0 | 1.821 | 0.129 | 0.014 | 0.145 | 202    |
|                  | -81.75 | 31.75 | F  | 0 | 0.497 | 0.063 | 0.007 | 0.115 | 229    |
