# Supplementary material for: Air–water CO 2 evasion from US East Coast estuaries
Source: Copernicus journal article supplement (doi:10.5194/bg-14-2441-2017), 2017-05-15
Supplement: Supplementary file [file bg-14-2441-2017-supplement-title-page.pdf › bg-14-2441-2017-supplement-title-page.pdf]

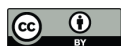

## *Supplement of*

# **Air–water CO<sub>2</sub> evasion from US East Coast estuaries**

**Goulven Gildas Laruelle et al.**

*Correspondence to:* Goulven Gildas Laruelle ([goulven.gildas.laruelle@ulb.ac.be](mailto:goulven.gildas.laruelle@ulb.ac.be))

- [bg-14-2441-2017-supplement-title-page.pdf](#)
- [Table S1.pdf](#)
- [Table S2.pdf](#)
- [Table S3.pdf](#)
- [Table S4.pdf](#)
- [Table S5.pdf](#)
- [Table S6.pdf](#)

The copyright of individual parts of the supplement might differ from the CC-BY 3.0 licence.
